# Supplementary material for: In Vitro Evaluation of the Effects of Hyaluronic Acid and an Aminoacidic Pool on Human Osteoblasts
Source: MDPI journal article supplement (doi:10.3390/biomedicines11030751), 2023-03-01
Supplement: s1 [file s1]

## Supplementary Materials

# *In vitro* evaluation of the effects of hyaluronic acid and an aminoacidic pool on human osteoblasts

Maria Addolorata Bonifacio <sup>1,†</sup>, Amalia Cassano <sup>1,†</sup>, Alessandra Vincenti <sup>1</sup>, Angela Vinella <sup>1</sup>, Fabio Dell'Olio <sup>2</sup>, Gianfranco Favia <sup>2</sup>, and Maria Addolorata Mariggio <sup>1,\*</sup>

<sup>1</sup> Department of Precision and Regenerative Medicine and Ionian Area, University of Bari Aldo Moro Medical School, 70124 Bari, Italy; m.bonifacio@studenti.uniba.it; lianacassano@libero.it; a.vincenti2005@gmail.com; angela.vinella@uniba.it; mariaaddolorata.mariggio@uniba.it

<sup>2</sup> Department of Interdisciplinary Medicine, University of Bari Aldo Moro, Italy; gianfranco.favia@uniba.it; f.dellolio.odo@outlook.it

\* Correspondence: mariaaddolorata.mariggio@uniba.it

† These authors equally contributed to the work.

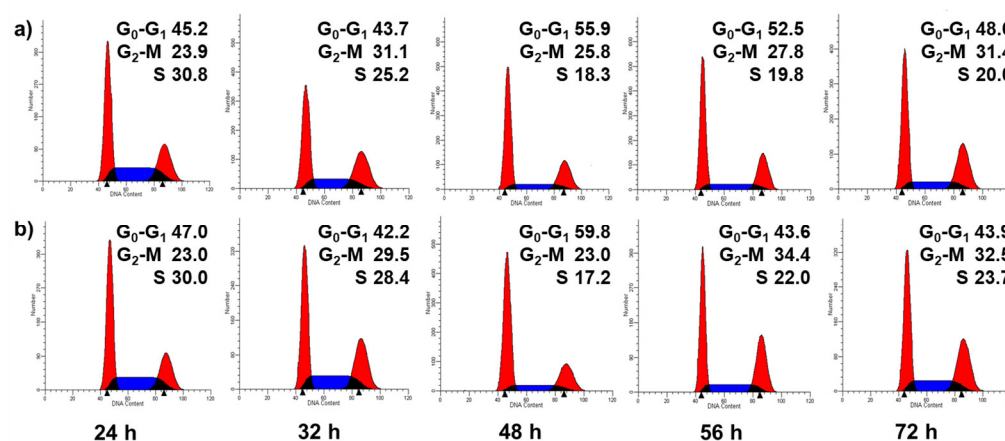

**Figure S1.** Flow-cytometry analyses performed on untreated NHOst cells (a) or on NHOst cells exposed to HA+AA. Cell cycle phases have been studied by ModFit LT™ software (Verity Software House, Topsham, ME, USA).

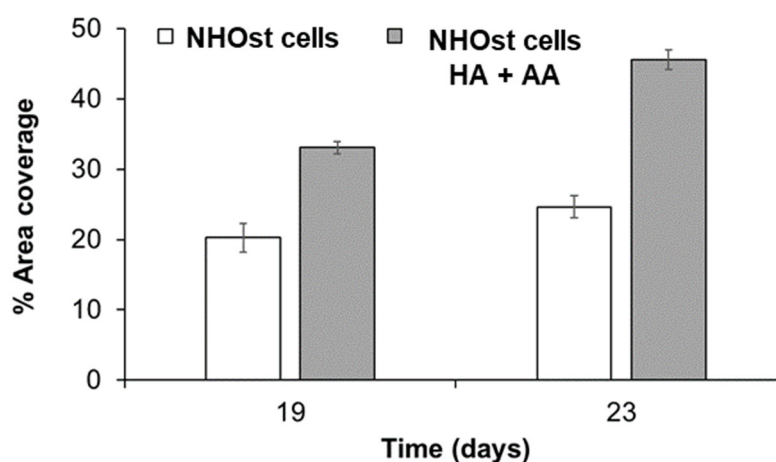

**Figure S2.** Percentage area covered by NHOst cells stained with Fast Red. Data are expressed as mean  $\pm$  standard deviation and are referred to three different optical fields per sample type.

**Citation:** To be added by editorial staff during production.

Academic Editor: Firstname  
Lastname

Received: date

Revised: date

Accepted: date

Published: date

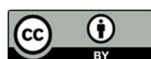

**Copyright:** © 2023 by the authors. Submitted for possible open access publication under the terms and conditions of the Creative Commons Attribution (CC BY) license (<https://creativecommons.org/licenses/by/4.0/>).
